# Supplementary material for: Synthetic, structural and kinetic studies on the binding of cyclohexane-1,2-bis(4-methyl-3-thiosemicarbazone) to divalent metal ions (Co, Ni, Cu, Zn or Cd)
Source: Royal Society of Chemistry journal article supplement (doi:10.1039/b814852j), 2008-11-12
Supplement: b814852j.pdf [file b814852j.pdf]

## **SUPPLEMENTARY DATA**

**Synthetic, Structural and Kinetic Studies on the Binding of Cyclohexane-1,2-bis(4-methyl-3-thiosemicarbazone) to Divalent Metal Ions (Co, Ni, Cu, Zn or Cd)**

*Ahmed Jasim M. Al-Karawi, William Clegg, Ross W. Harrington and  
Richard A. Henderson*

**Supplementary Data: Table 1**

Kinetic Data for the Reactions between  $M^{2+}$  ( $M = \text{Zn, Cd, Co, Ni or Cu}$ ) and CHMTSC in MeCN at 25.0 °C

| metal | $[M^{2+}] / \text{mmol dm}^{-3}$ | $[\text{CHMTSC}] / \text{mmol dm}^{-3}$ | $k_{\text{obs}} / \text{s}^{-1}$ |      |
|-------|----------------------------------|-----------------------------------------|----------------------------------|------|
| Cd    | 0.2                              | 2.0                                     | 1.0                              |      |
|       |                                  | 4.0                                     | 2.1                              |      |
|       |                                  | 6.0                                     | 3.37                             |      |
|       |                                  | 8.0                                     | 5.3                              |      |
|       |                                  | 10.0                                    | 6.2                              |      |
|       | 0.5                              | 10.0                                    | 6.5                              |      |
|       |                                  | 1.0                                     | 10.0                             | 6.2  |
|       |                                  |                                         |                                  |      |
|       | Zn                               | 0.2                                     | 2.0                              | 1.1  |
|       |                                  |                                         | 4.0                              | 1.5  |
| 6.0   |                                  |                                         | 3.9                              |      |
| 8.0   |                                  |                                         | 5.7                              |      |
| 10.0  |                                  |                                         | 6.4                              |      |
| 0.5   |                                  | 10.0                                    | 6.5                              |      |
|       |                                  | 1.0                                     | 10.0                             | 6.5  |
|       |                                  |                                         |                                  |      |
| Co    |                                  | 0.2                                     | 2.0                              | 1.9  |
|       |                                  |                                         | 4.0                              | 5.8  |
|       | 6.0                              |                                         | 7.7                              |      |
|       | 8.0                              |                                         | 11.0                             |      |
|       | 10.0                             |                                         | 12.7                             |      |
|       | 0.5                              | 10.0                                    | 12.0                             |      |
|       |                                  | 1.0                                     | 10.0                             | 12.2 |
|       |                                  |                                         |                                  |      |
|       | Ni                               | 0.2                                     | 2.0                              | 1.0  |
|       |                                  |                                         | 4.0                              | 2.1  |
| 6.0   |                                  |                                         | 3.37                             |      |
| 8.0   |                                  |                                         | 5.3                              |      |
| 10.0  |                                  |                                         | 6.2                              |      |
| 0.5   |                                  | 10.0                                    | 6.5                              |      |
|       |                                  | 1.0                                     | 10.0                             | 6.0  |
|       |                                  |                                         |                                  |      |
| Cu    |                                  | 0.2                                     | 2.0                              | 5.2  |
|       |                                  |                                         | 4.0                              | 13.5 |
|       | 6.0                              |                                         | 14.4                             |      |
|       | 8.0                              |                                         | 15.5                             |      |
|       | 10.0                             |                                         | 19.9                             |      |
|       | 0.5                              | 10.0                                    | 20.5                             |      |
|       |                                  | 1.0                                     | 10.0                             | 19.2 |
|       |                                  |                                         |                                  |      |
